# Supplementary material for: What is a drought-to-flood transition? Pitfalls and recommendations for defining consecutive hydrological extreme events
Source: Copernicus journal article supplement (doi:10.5194/egusphere-2025-1391), 2025-04-16
Supplement: Supplementary file 1 [file egusphere-2025-1391-supplement.pdf]

# **Supplementary Materials for: What is a drought-to-flood transition? Pitfalls and recommendations for defining consecutive hydrological extreme events**

Bailey J. Anderson<sup>1,2,3</sup>, Eduardo Muñoz-Castro<sup>1,2,3</sup>, Lena M. Tallaksen<sup>4</sup>, Alessia Matano<sup>5</sup>, Jonas Götte<sup>1,2,3</sup>, Rachael Armitage<sup>7</sup>, Eugene Magee<sup>7</sup>, and Manuela I. Brunner<sup>1,2,3</sup>

<sup>1</sup>Institute for Atmospheric and Climate Science, ETH Zurich, Zurich, Switzerland

<sup>2</sup>WSL Institute for Snow and Avalanche Research SLF, Davos Dorf, Switzerland

<sup>3</sup>Climate Change, Extremes and Natural Hazards in Alpine Regions Research Center CERC, Davos Dorf, Switzerland

<sup>4</sup>Department of Geosciences, University of Oslo, Oslo, Norway

<sup>5</sup>Institute for Environmental Studies (IVM), Vrije Universiteit Amsterdam, Amsterdam, The Netherlands

<sup>7</sup>UK Centre for Ecology and Hydrology, Wallingford, United Kingdom

## **1 Contents**

Table S1

**Table 1.** Further information about case study events.

| Case Study                                    | Case study event drivers                                                                                                     | Streamflow gauge                                  | Data source                                | Catchment area |
|-----------------------------------------------|------------------------------------------------------------------------------------------------------------------------------|---------------------------------------------------|--------------------------------------------|----------------|
| Australia: Daintree River                     | Heavy rain and high tides in December (1) followed by an active monsoon trough and slow-moving low pressure system [F](2, 3) | WMIP Gauge ID: 108002A                            | Streamflow and catchment outline (4)       | 913 $km^2$     |
| California, USA: Ventura River                | Atmospheric rivers [F] (5), precipitation deficit [D] (5)                                                                    | USGS Gauge ID: 11118500                           | Streamflow (6) and catchment outline (7)   | 486 $km^2$     |
| Chile: Rio Colorado                           | Strong La Niña year [D] (8)                                                                                                  | Camels Chile Gauge ID: 7112001                    | Streamflow and catchment outline (9)       | 878 $km^2$     |
| England: River Aire                           | Persistent blocked weather patterns [D], jet stream [F] (10)                                                                 | NRFA Gauge ID: 27080                              | Streamflow and catchment outline (11)      | 862 $km^2$     |
| Italy: River Savio (Tributary of the Po)      | Below average snowfall (D), persistent anomalous anticyclonic circulation (D), Storm Minerva (F)                             | Arpae Emilia Romagna Gauge ID: Savio at San Carlo | Streamflow (12) and catchment outline (13) | 580 $km^2$     |
| Norway: Ulvåa River (Tributary of the Glomma) | Hot and wet October weather resulted in early snow melt and heavy precipitation [F] (14)                                     | NVE Gauge ID: 103.1.0                             | Streamflow and catchment outline (15)      | 432 $km^2$     |
| Switzerland: River Emme                       |                                                                                                                              | BAFU Gauge ID: 2409                               | Streamflow and catchment outline (16)      | 124 $km^2$     |
| Texas, USA: Llano River                       | Heavy convective rainstorm [F] (17-18), hot and dry summer weather [D] (19)                                                  | USGS Gauge ID: 8151500                            | Streamflow (6) and catchment outline (7)   | 10899 $km^2$   |

**References:** 1. Jess Fagan (2023), 2. Staff Writers (2018), 3. ?, 4. (Fowler et al., 2021), 5. (Medellín-Azuara et al., 2022), 6. (Cicco et al., 2022), 7. (U.S. Geological Survey and U.S. Department of Agriculture, Natural Resources Conservation Service, 2015), 8. (Oertel et al., 2020), 9. (Alvarez-Garretón et al., 2018), 10. (Kendon et al., 2013), 11. (Vitolo et al., 2017), 12. (Arpae Emilia-Romagna, 2025), 13. (Nascimento et al., 2024), 14.(Nina Berglund, 2018), 15. (Norwegian Water Resources and Energy Directorate (NVE), 2025), 16.(Swiss Federal Office for the Environment (BAFU), 2025), 17. (Anna Skinner, 2023a), 18. (Anna Skinner, 2023b), 19. (noa, 2023)

## References

- No Highland Lakes water available for LCRA agricultural customers this year - LCRA - Energy, Water, Community, <https://www.lcra.org/news/news-releases/no-highland-lakes-water-available-for-lcra-agricultural-customers-this-year/>, 2023.
- Alvarez-Garretón, C., Mendoza, P. A., Boisier, J. P., Addor, N., Galleguillos, M., Zambrano-Bigiarini, M., Lara, A., Puelma, C., Cortes, G., Garreaud, R., McPhee, J., and Ayala, A.: The CAMELS-CL dataset: catchment attributes and meteorology for large sample studies – Chile dataset, *Hydrology and Earth System Sciences*, 22, 5817–5846, <https://doi.org/10.5194/hess-22-5817-2018>, publisher: Copernicus GmbH, 2018.
- Anna Skinner: Chart Shows Lake Travis’ Dramatic Change in Water Levels After Sudden Flood, *News Week*, <https://www.newsweek.com/chart-shows-lake-travis-dramatic-change-water-levels-after-sudden-flood-1839063>, 2023a.
- Anna Skinner: Texas River Floods After Massive Water Level Increase Overnight, *News Week*, <https://www.newsweek.com/texas-river-floods-after-massive-water-level-increase-overnight-1838326>, 2023b.
- Arpae Emilia-Romagna: Dext3r - Hydrological Data Platform, <https://simc.arpae.it/dext3r/>, 2025.
- Cicco, L. A. D., Lorenz, D., Hirsch, R. M., Watkins, W., and Johnson, M.: dataRetrieval: R packages for discovering and retrieving water data available from U.S. federal hydrologic web services, U.S. Geological Survey, Reston, VA, <https://doi.org/10.5066/P9X4L3GE>, backup Publisher: U.S. Geological Survey Version Number: 2.7.11, 2022.
- Fowler, K. J. A., Acharya, S. C., Addor, N., Chou, C., and Peel, M. C.: CAMELS-AUS: hydrometeorological time series and landscape attributes for 222 catchments in Australia, *Earth System Science Data*, 13, 3847–3867, <https://doi.org/10.5194/essd-13-3847-2021>, publisher: Copernicus GmbH, 2021.
- Jess Fagan: Mangroves remember droughts — this could be bad news for our coastlines, *ANU Reporter*, <https://reporter.anu.edu.au/all-stories/mangroves-remember-droughts-this-could-be-bad-news-for-our-coastlines>, 2023.
- Kendon, M., Marsh, T., and Parry, S.: The 2010–2012 drought in England and Wales, *Weather*, 68, 88–95, <https://doi.org/10.1002/wea.2101>, [\\_eprint: https://onlinelibrary.wiley.com/doi/pdf/10.1002/wea.2101](https://onlinelibrary.wiley.com/doi/pdf/10.1002/wea.2101), 2013.
- Medellín-Azuara, J., Escrivá-Bou, A., Rodríguez-Flores, J. M., Cole, S. A., Abatzoglou, J. T., Viers, J. H., Santos, N., Summer, D. A., Medina, C., and Arévalo, R.: Economic Impacts of the 2020–22 Drought on California Agriculture, UC Merced, [https://cawaterlibrary.net/wp-content/uploads/2022/11/20AmSf-Economic\\_Impact\\_CA\\_Drought\\_V01.pdf](https://cawaterlibrary.net/wp-content/uploads/2022/11/20AmSf-Economic_Impact_CA_Drought_V01.pdf), 2022.
- Nascimento, T. V. M., Rudlang, J., Höge, M., van der Ent, R., Chapon, M., Seibert, J., Hrachowitz, M., and Fenicia, F.: EStreams: An integrated dataset and catalogue of streamflow, hydro-climatic and landscape variables for Europe, *Scientific Data*, 11, 879, <https://doi.org/10.1038/s41597-024-03706-1>, publisher: Nature Publishing Group, 2024.
- Nina Berglund: Flash floods sweep through valleys, <https://www.newsinenglish.no/2018/10/14/flash-floods-sweeping-through-valleys/>, 2018.
- Norwegian Water Resources and Energy Directorate (NVE): NVE Hydrological API, <https://api.nve.no/hydrological>, 2025.
- Oertel, M., Meza, F. J., and Gironás, J.: Observed trends and relationships between ENSO and standardized hydrometeorological drought indices in central Chile, *Hydrological Processes*, 34, 159–174, <https://doi.org/10.1002/hyp.13596>, [\\_eprint: https://onlinelibrary.wiley.com/doi/pdf/10.1002/hyp.13596](https://onlinelibrary.wiley.com/doi/pdf/10.1002/hyp.13596), 2020.
- Staff Writers: Daintree Ferry closed as river flooding causes chaos, *Newspost*, <https://archive.newspost.com.au/2018/december/daintree-ferry-closed-as-river-flooding-causes-chaos>, 2018.

- Swiss Federal Office for the Environment (BAFU): Hydrological Data Service for Watercourses and Lakes,  
40 <https://www.bafu.admin.ch/bafu/en/home/topics/water/state/data/obtaining-monitoring-data-on-the-topic-of-water/hydrological-data-service-for-watercourses-and-lakes.html>, 2025.
- U.S. Geological Survey and U.S. Department of Agriculture, Natural Resources Conservation Service: National Watershed Boundary Dataset (WBD), <https://www.usgs.gov/national-hydrography/watershed-boundary-dataset>, 2015.
- Vitolo, C., Fry, M., and Buytaert, W.: rnrf: An R package to Retrieve, Filter and Visualize Data from the UK National River Flow Archive,  
45 The R Journal, 8, 102–116, <https://rjournal.github.io/>, 2017.
